# Supplementary material for: Description of Neochlorella semenenkoi gen. et. sp. nov. (Chlorophyta, Trebouxiophyceae), a Novel Chlorella-like Alga with High Biotechnological Potential
Source: MDPI journal article supplement (doi:10.3390/d15040513), 2023-04-03
Supplement: s1 [file s1]

## Supplementary Materials

### Description of *Neochlorella semenenkoi* gen. et. sp. nov. (Chlorophyta, Trebouxiophyceae), a novel *Chlorella*-like alga with high biotechnological potential

Elena Krivina, Lidia Bobrovnikova , Anna Temraleeva, Alexandra Markelova, David Gabrielyan and Maria Sinetova

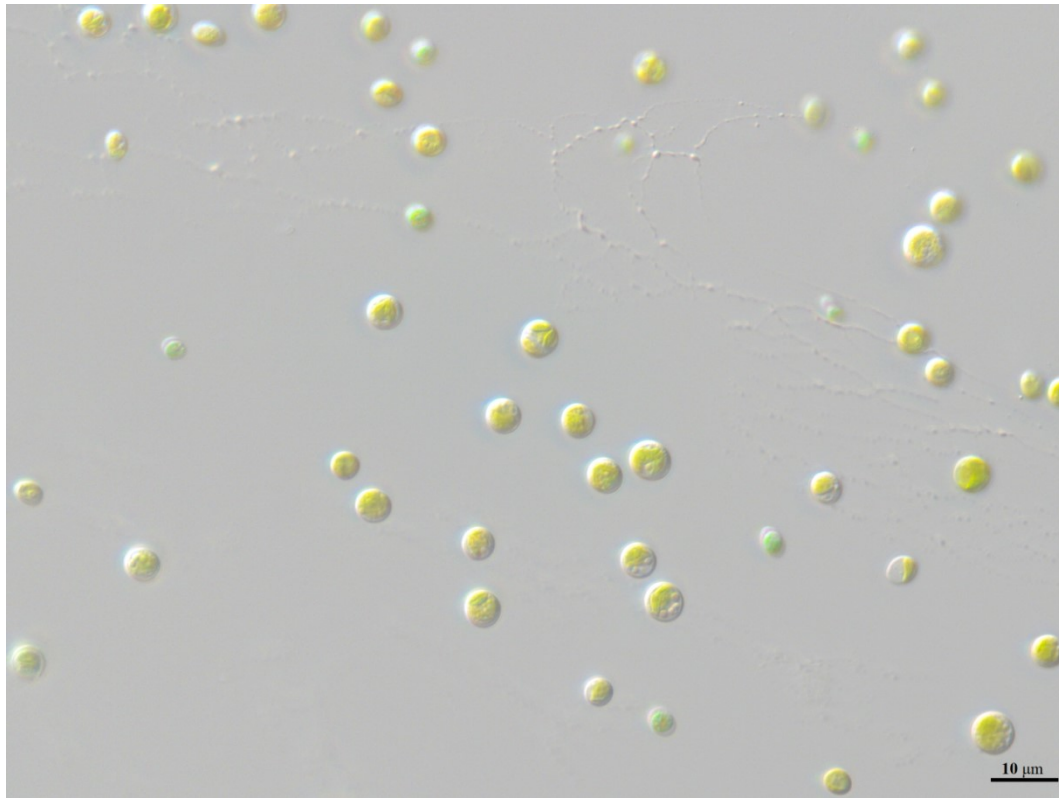

**Figure S1.** Cell morphology of *Neochlorella semenenkoi* IPPAS C-1210 after the grazing test: a 3-day-old culture grown in BG-11 with the phycophagous *Brachionus rotundiformis*.

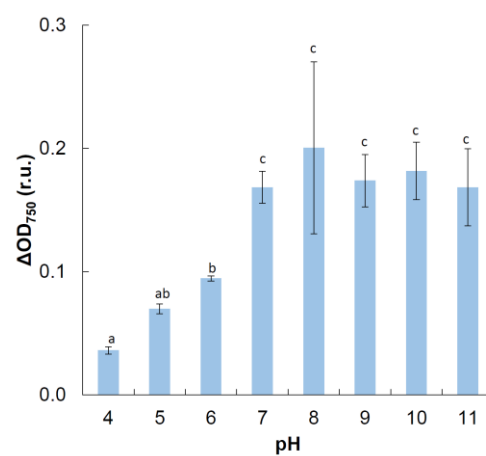

**Figure S2.** Growth of *Neochlorella semenenkoi* IPPAS C-1210 at different pH. Error bars show standard deviations of the mean (n=3). The variants with the same letter are not significantly different (one-way ANOVA analysis, post hoc Tukey HSD test;  $p < 0.05$ ). The second experiment out of two is shown.

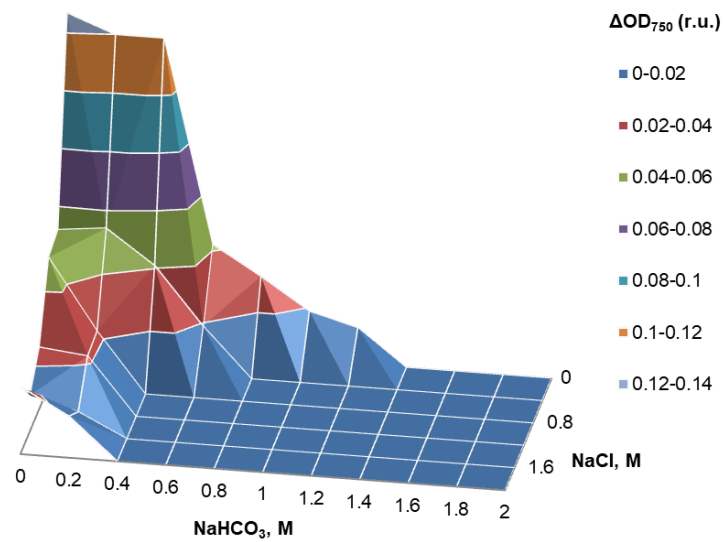

**Figure S3.** Growth of *Neochlorella semenenkoi* IPPAS C-1210 in the concentration matrix  $\text{NaHCO}_3$  and  $\text{NaCl}$ . The second experiment out of two is shown.
